# EDITORIAL NOTE

## Editorial Note: Household latrine utilization and associated factors in semi-urban areas of northeastern Ethiopia

The *PLOS One* Editors

This article [1] was identified as one of a series of articles for which the *PLOS One* Editors have concerns about authorship and adherence to the journal's first and second publication criteria. We regret that the issues were not addressed prior to the article's publication.

### Reference

1. Asnake D, Adane M. Household latrine utilization and associated factors in semi-urban areas of northeastern Ethiopia. *PLoS One*. 2020;15(11):e0241270. <https://doi.org/10.1371/journal.pone.0241270> PMID: [33180832](https://pubmed.ncbi.nlm.nih.gov/33180832/)

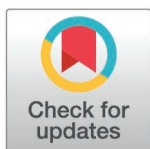

### OPEN ACCESS

**Citation:** The *PLOS One* Editors (2025) Editorial Note: Household latrine utilization and associated factors in semi-urban areas of northeastern Ethiopia. *PLoS One* 20(7): e0327901. <https://doi.org/10.1371/journal.pone.0327901>

**Published:** July 9, 2025

**Copyright:** © 2025 The *PLOS One* Editors. This is an open access article distributed under the terms of the [Creative Commons Attribution License](https://creativecommons.org/licenses/by/4.0/), which permits unrestricted use, distribution, and reproduction in any medium, provided the original author and source are credited.
